# Supplementary material for: In situ-grown tungsten carbide nanoparticles on nanocarbon as an electrocatalyst to promote the redox reaction kinetics of high-mass loading sulfur cathode for high volumetric performance
Source: Royal Society of Chemistry journal article supplement (doi:10.1039/d0ta07464k), 2020-01-01
Supplement: d0ta07464k1.pdf [file d0ta07464k1.pdf]

## Supplementary Information

### **In-situ growth of tungsten carbide nanoparticles on nanocarbon as electrocatalyst promotes redox reaction kinetics of high mass loading sulfur cathode for high volumetric performance**

Jing Zhang <sup>a,†</sup>, Shaorong Duan <sup>b,†</sup>, Caiyin You <sup>a\*</sup>, Jian Wang <sup>c</sup>, Haitao Liu <sup>d</sup>,  
Shaohua Guo <sup>a</sup>, Weihua Zhang <sup>a</sup>, Rong Yang <sup>e</sup>

<sup>a</sup> *School of Materials Science and Engineering, Xi'an University of Technology, Xi'an 710048, P. R. China*

<sup>b</sup> *State Key Laboratory of Low Dimensional Quantum Physics and Department of Physics, Tsinghua University, Beijing, 100084, China*

<sup>c</sup> *i-Lab, Suzhou Institute of Nano-Tech and Nano-Bionics, Chinese Academy of Sciences, Suzhou, Jiangsu, 215123, P. R. China*

<sup>d</sup> *Laboratory of Computational Physics, Institute of Applied Physics and Computational Mathematics, Beijing, 100088, China*

<sup>e</sup> *School of Sciences, Xi'an University of Technology, Xi'an 710048, P. R. China*

\* Corresponding author: [caiyinyou@xaut.edu.cn](mailto:caiyinyou@xaut.edu.cn)

† These authors contributed equally to this work.

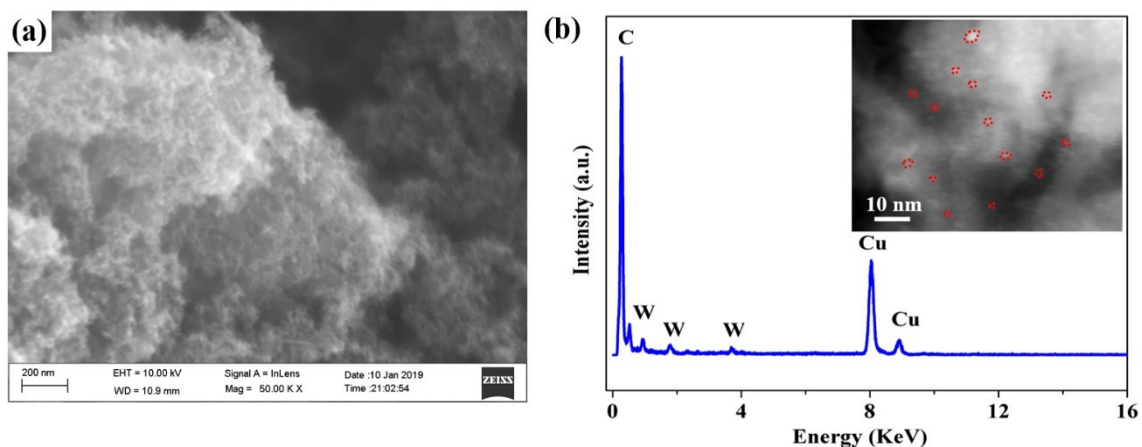

**Fig. S1** (a) SEM image of HCPC; (b) Component analysis from the bright spots in the ADF-TEM image of WCNP@HCPC (the inset).

Fig. S1 (b) shows the energy-dispersive X-ray spectrum (EDX) of WC NPs (the bright spots highlighted by red dashed line) from the scanning TEM (STEM) image. The characteristic peaks of W and C are perfectly assigned to the WC NPs, while the peaks of Cu are attributed to the sample grid.

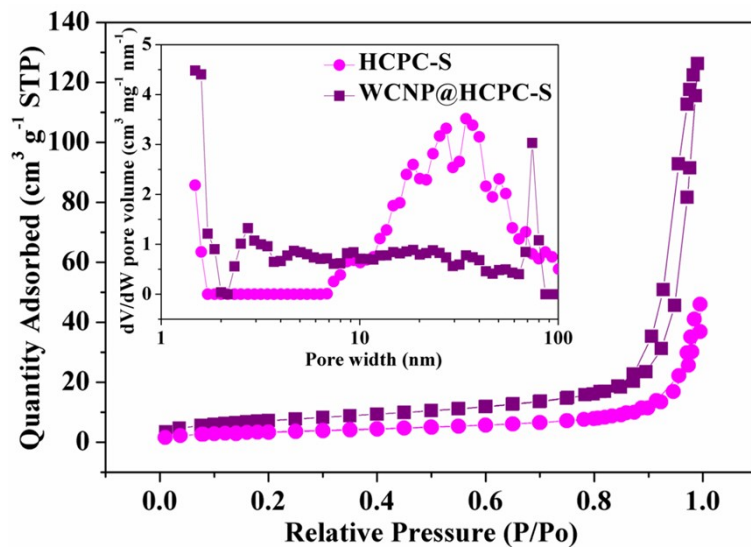

**Fig. S2**  $N_2$  adsorption/desorption isotherms and the inset of the pore size distribution of WCNP@HCPC-S and HCPC-S composites.

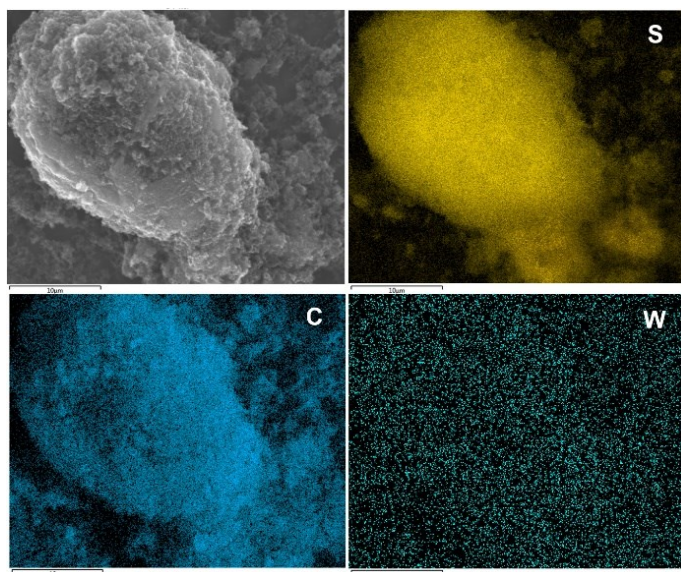

**Fig. S3** Elemental mapping of WCNP@HCPC-S composite, including: elemental sulfur, carbon and tungsten.

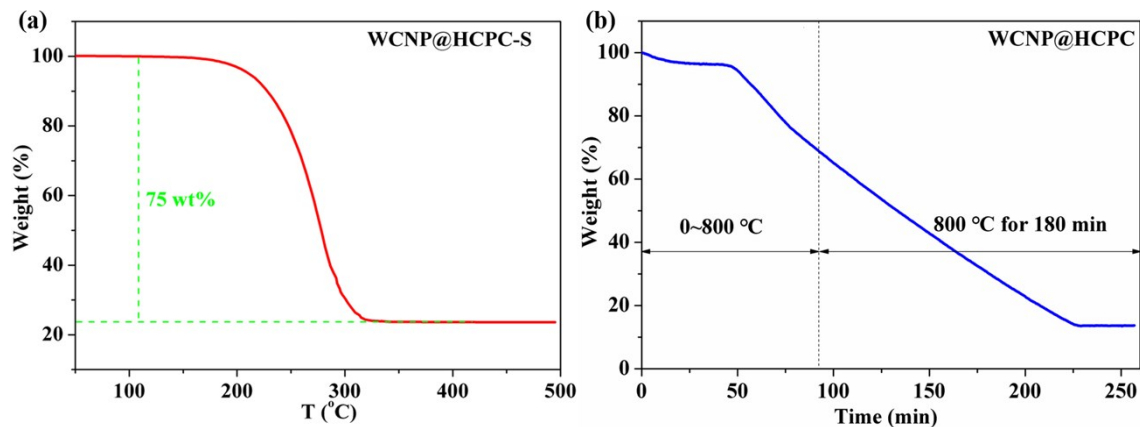

**Fig. S4** (a) TGA curve of WCNP@HCPC-S under N<sub>2</sub> flow atmosphere; (b) TGA curve of WCNP@HCPC under O<sub>2</sub> flow atmosphere.

The TGA curve of WCNP@HCPC (Fig. S2b) under O<sub>2</sub> flow atmosphere reveals the mass residual of 13 wt % after heating. According to the reaction equation (1), the weight of the WC increases to nearly 1.2 times when it is transformed to WO<sub>3</sub> under the high temperature heating. Therefore, it could be deduced that the remained mass in Fig. S2b is evaluated to be about 10.5 wt% (12.6% / 1.2) WC. This experimental result matches well with the nominal designed ratio.

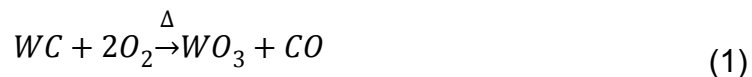

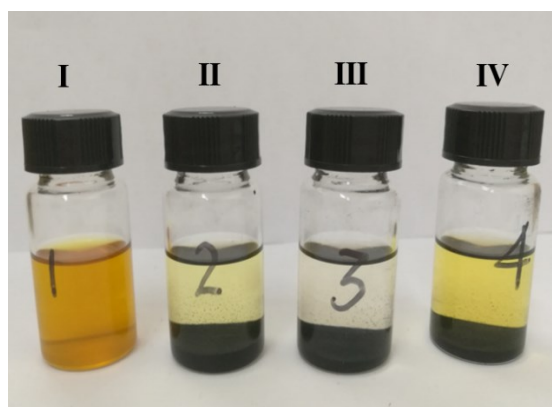

**Fig.S5** Photo image of polysulfide solution after soaking in the adsorbents for 12 h: I Control; II WCB@HCPC; III WCNP@HCPC; IV HCPC.

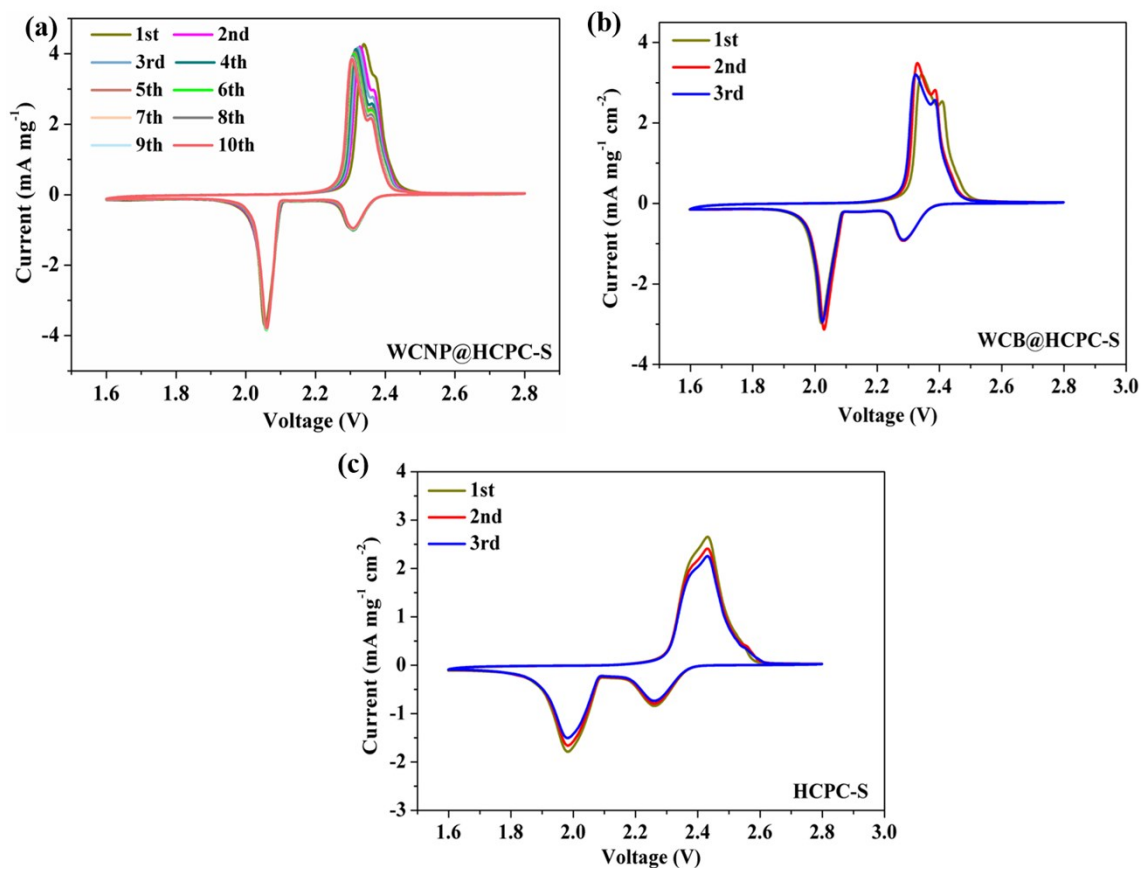

**Fig. S6** Cyclic voltammetry (CV) curves of (a) WCNP@HCPC-S; (b) WCB@HCPC-S and (c) HCPC-S cathodes within the scan range from 1.6 to 2.8V (vs. Li/Li<sup>+</sup>) at the scan rate of 0.1 mV s<sup>-1</sup>.

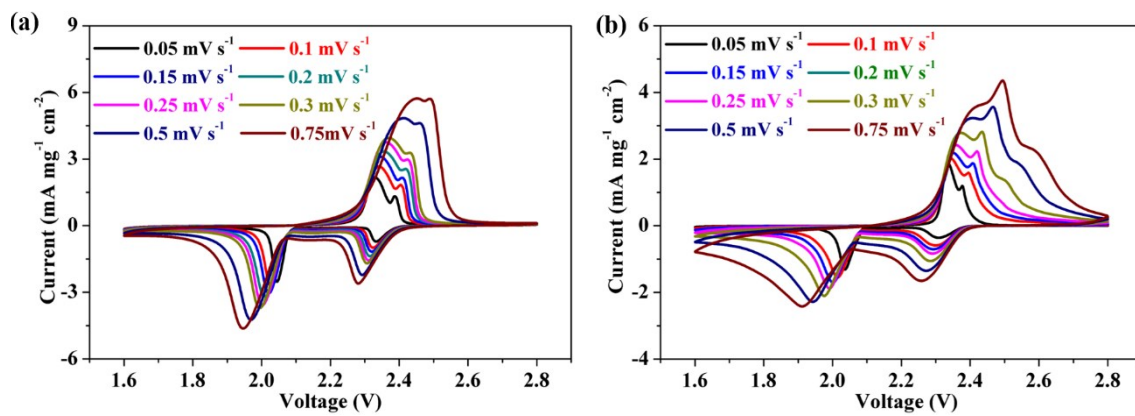

**Fig. S7** CV curves of (a) WCB@HCPC-S and (b) HCPC-S cathodes depending on different scan rates.



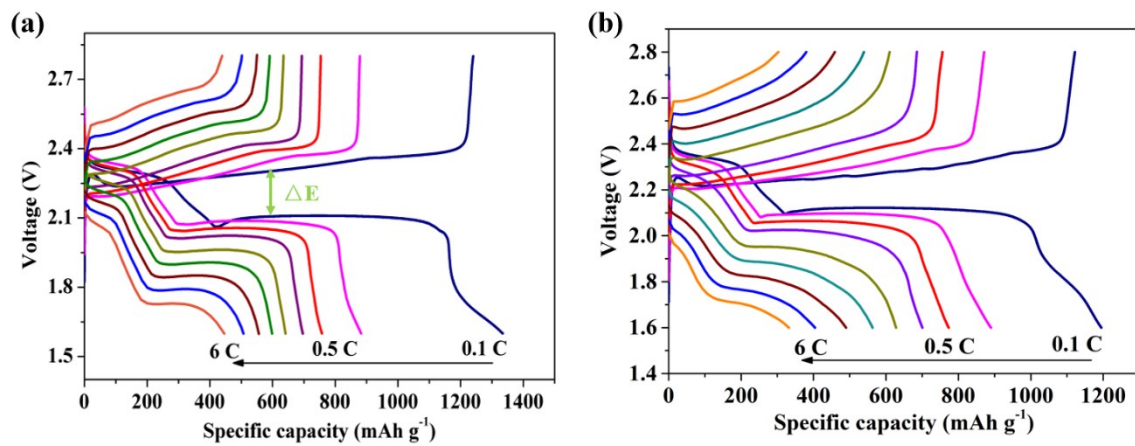

**Fig. S8** Voltage-capacity profiles of (a) WCB@HCPC-S and (b) HCPC-S cathodes at rates varying from 0.1 to 6 C

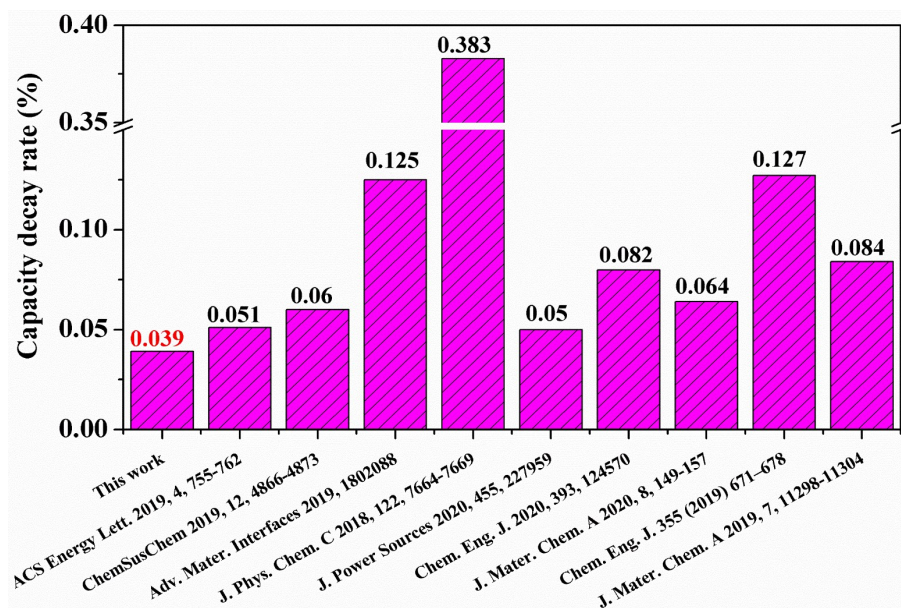

**Fig. S9** Comparison of the capacity decay of this work at high rate with the recent articles

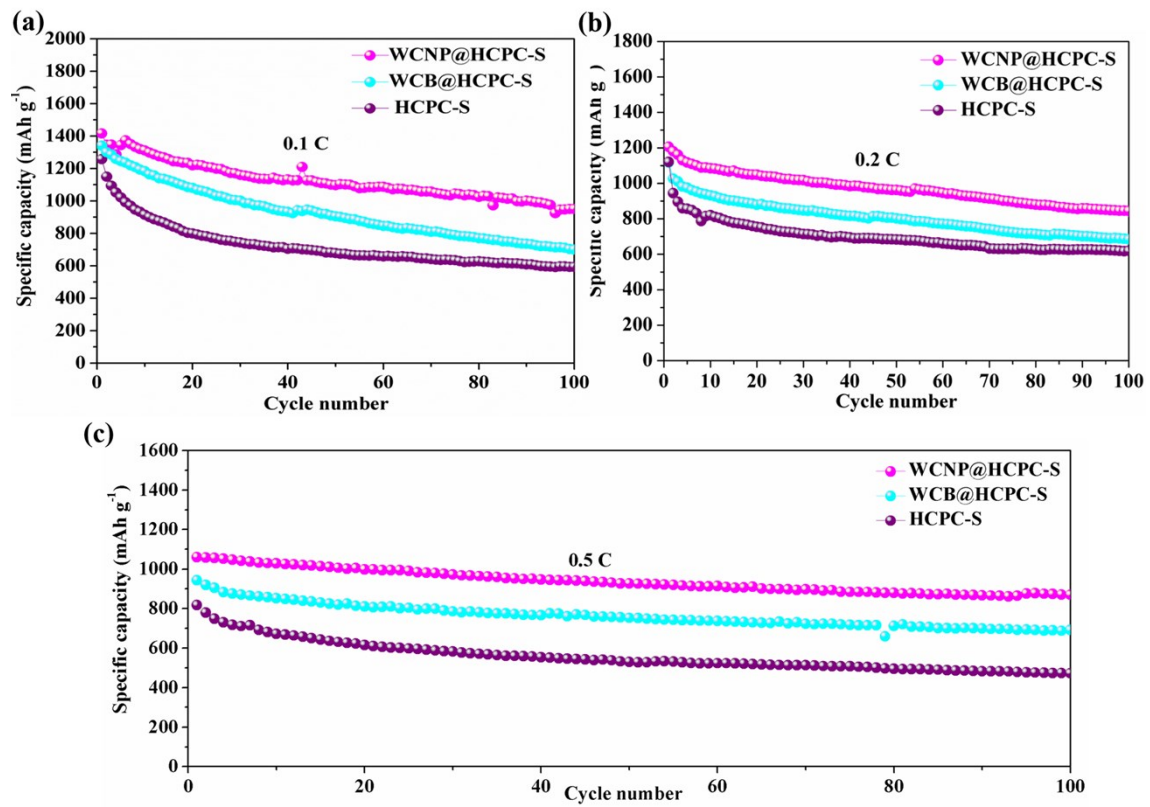

**Fig. S10** Cycle performance of the cathodes at (a) 0.1 C, (b) 0.2 C and (c) 0.5 C.

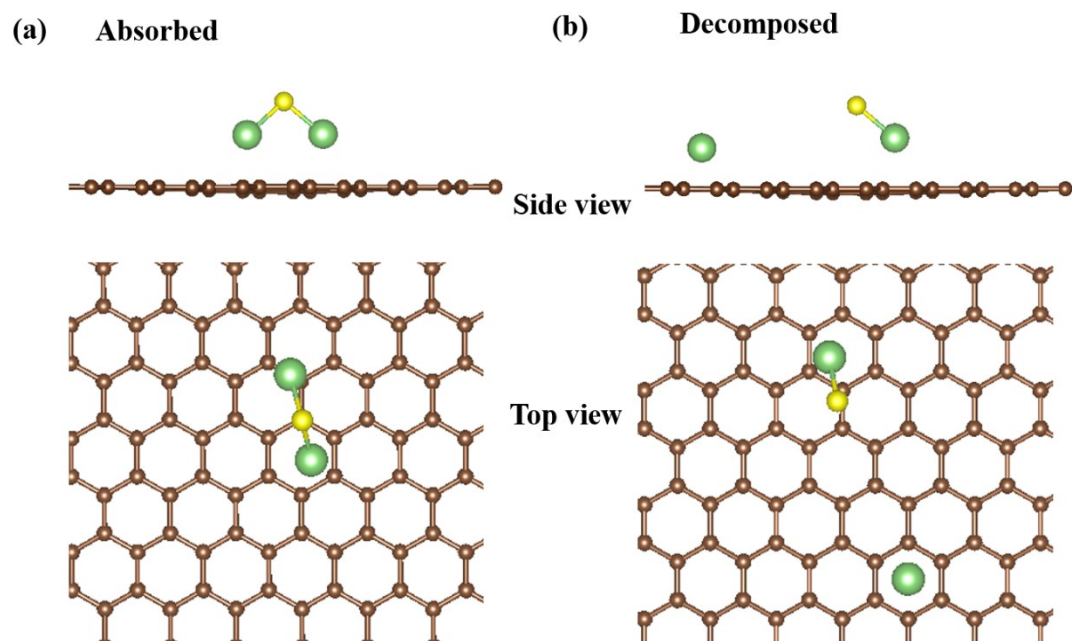

**Fig. S11** The calculated delithiation models of Li<sub>2</sub>S on HCPC surface in the (a) initially adsorbed and (b) decomposed structure.

Table S1 Electrochemical parameters derived from Tafel plots

| Samples     | Tafel slop<br>(mV dec <sup>-1</sup> ) | Exchange current density<br>(mA cm <sup>-2</sup> ) |
|-------------|---------------------------------------|----------------------------------------------------|
| WCNP@HCPC-S | 19.3                                  | 0.29                                               |
| WCB@HCPC-S  | 26.5                                  | 0.20                                               |
| HCPC-S      | 52.4                                  | 0.13                                               |

Table S2 Comparison of adsorption energy and delithiation energy barriers

| Samples             | Adsorption energy (eV) | Delithiation energy barriers (eV) |
|---------------------|------------------------|-----------------------------------|
| HCPC                | -0.64                  | 2.14                              |
| WC (0001)           | -5.82                  | 0.10                              |
| WC ( $10\bar{1}0$ ) | -5.69                  | 0.06                              |
